# Supplementary material for: Clinical Implication of Facial Nerve Decompression in Complete Bell’s Palsy: A Systematic Review and Meta-Analysis
Source: PubMed Central journal article supplement — Clin Exp Otorhinolaryngol. 2019 Sep 7;12(4):348–59. doi: 10.21053/ceo.2019.00535 (PMC6787481; doi:10.21053/ceo.2019.00535), 2019-09-07
Supplement: ceo-2019-00535-suppl.pdf [file ceo-2019-00535-suppl.pdf]

**Supplementary Table 1.** The recovery of facial function and characteristics according to HBGS and May's classification (modified HBGS)

| May's classification | HB grading system (HBGS) | Characteristics                                                  |
|----------------------|--------------------------|------------------------------------------------------------------|
| Complete             | HBGS I                   | Normal function or complete facial function recovery             |
| Fair                 | HBGS II–III              | Slight to moderate facial weakness and synkinesis                |
| Failed               | HBGS IV–VI               | Severe facial weakness, synkinesis, and contracture and/or spasm |

HBGS, House-Brackmann grading system.

**Supplementary Table 2.** Cochrane collaboration's tool for assessing risk of bias

| Study                 | a | b | c | d | e | f | g |
|-----------------------|---|---|---|---|---|---|---|
| Li et al. (2016) [19] | + | – | – | – | ? | + | ? |
| Brown (1982) [13]     | + | – | – | – | ? | + | ? |

a, random sequence generation; b, allocation concealment; c, blinding of participants and personnel; d, blinding of outcomes assessment; e, incomplete outcome data; f, selective reporting; g, other bias; +, low risk of bias; –, high risk of bias; ?, unclear risk of bias.

**Supplementary Table 3.** Newcastle-Ottawa scale of bias risk for the non-randomized studies

| Study                         | Adequate case definition | Representativeness of cases | Selection of controls | Definition of controls | Comparability | Ascertainment of exposure | Method of ascertainment | Nonresponse rate | Score/10 |
|-------------------------------|--------------------------|-----------------------------|-----------------------|------------------------|---------------|---------------------------|-------------------------|------------------|----------|
| Kim et al. (2016) [8]         | *                        | *                           | *                     | *                      | **            | *                         | *                       |                  | 8        |
| Yanagihara et al. (2001) [20] | *                        | *                           | *                     | *                      | **            | *                         | *                       |                  | 8        |
| Gantz et al. (1999) [21]      | *                        | *                           | *                     | *                      | **            | *                         | *                       |                  | 8        |
| May et al. (1985) [22]        | *                        | *                           | *                     | *                      | **            | *                         | *                       |                  | 8        |
